# Supplementary material
Source: PubMed Central journal article supplement (PMC6645825)
Supplement: ao7b01666_si_002.pdf [file ao7b01666_si_002.pdf]

## Supporting information:

# Ultrafine Highly Magnetic Fluorescent $\gamma$ -Fe<sub>2</sub>O<sub>3</sub>/NCD Nanocomposites for Neuronal Manipulations

Vijay Bhooshan Kumar<sup>a</sup>, Michal Marcus<sup>b</sup>, Ze'ev Porat<sup>c,d</sup>, Lior Shani<sup>e</sup>, Yosef Yeshurun<sup>e</sup>, Israel Felner<sup>f</sup>, Orit Shefi<sup>b</sup>, and Aharon Gedanken<sup>a\*</sup>

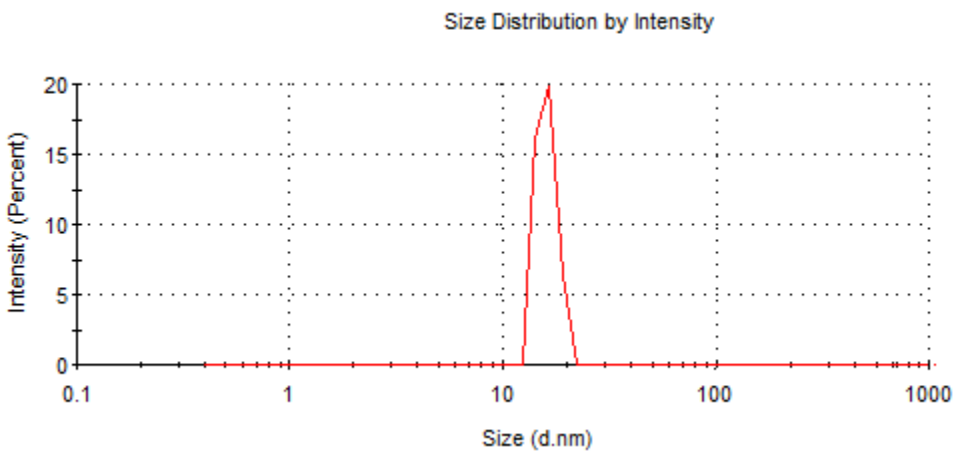

Figure S1: DLS size distribution curves of the  $\gamma$ -Fe<sub>2</sub>O<sub>3</sub>/NCD hybrid nanocomposites in water.

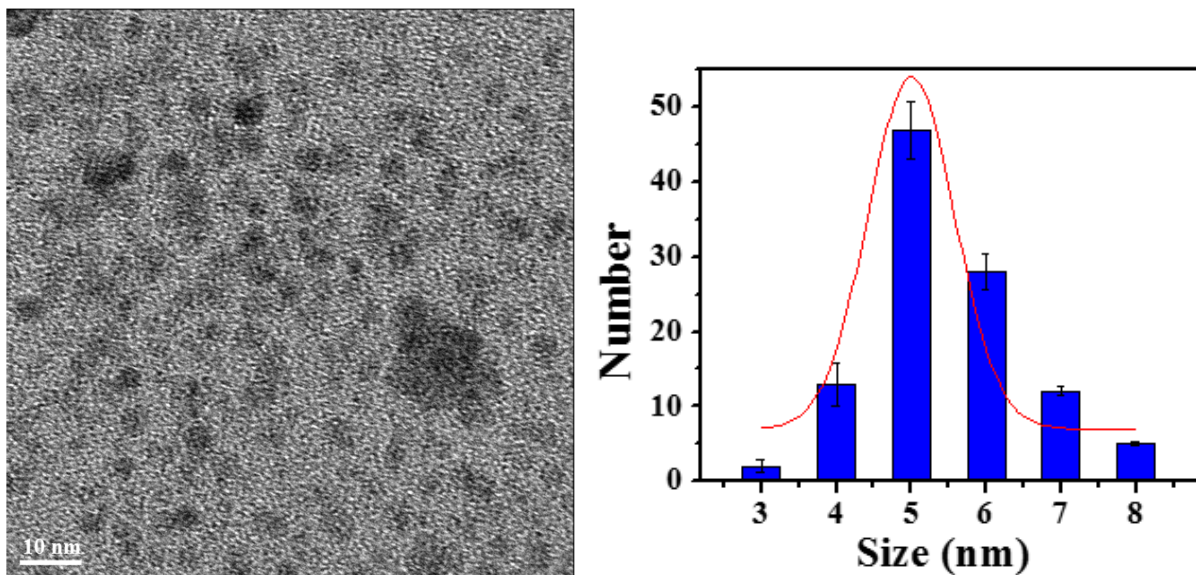

Figure S2: TEM image of NCDs dispersed in isopropanol (b) Size-distribution curve for 200 NCDs that were measured from the TEM image.

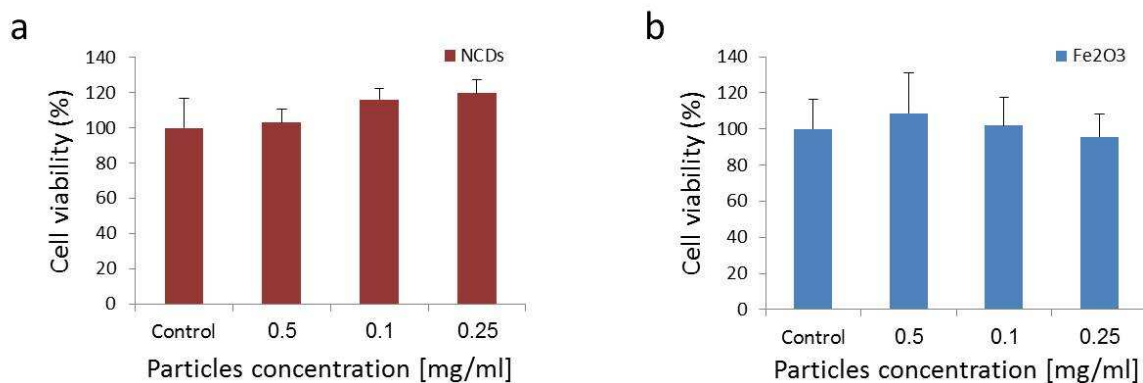

Figure S3: XTT viability assay of cells incubated with increasing concentrations of NCDs (a) and Fe<sub>2</sub>O<sub>3</sub> (b) after 24 of incubation ( $n = 3$ ). Results are normalized to control without particles.

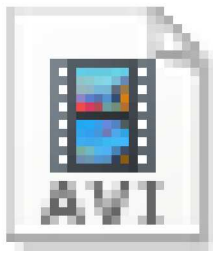

# vj 17-12-17 cut2.avi

Figure S4: Time-lapse observations demonstrated the movement of the  $\gamma$ -Fe<sub>2</sub>O<sub>3</sub>/NCD-treated cells towards the magnet
